# Supplementary material
Source: publisher site journal article supplement (https://www.spandidos-publications.com/1766/downloadSupplementary)
Supplement: Supplementary file 1 [file downloadSupplementary]

Table S1. Details of postoperative complications.

| Types of complication                                        | N  |
|--------------------------------------------------------------|----|
| Infection (i.e., intraperitoneal abscess or wound infection) | 7  |
| Anastomotic site leakage                                     | 9  |
| Paralytic ileus                                              | 6  |
| Bowel obstruction and/or anastomosis site stenosis           | 4  |
| Acute cholecystitis and/or gallbladder perforation           | 2  |
| Specific cause not stated                                    | 1  |
| Total                                                        | 29 |
